# Supplementary material for: Comparative Clinical Characteristics, Laboratory Findings, and Outcomes of Hypoxemic and Non-Hypoxemic Patients Treated at a Makeshift COVID-19 Unit in Bangladesh: A Retrospective Chart Analysis
Source: MDPI journal article supplement (doi:10.3390/jcm11112968), 2022-05-24
Supplement: s1 [file s1]

**Table S1.** Treatment and outcome profiles of COVID-19 affected in-patients.s

| <b>Characteristics</b>                    | <b>Oxygen required (n=88)</b> | <b>Oxygen not required (n=119)</b> |
|-------------------------------------------|-------------------------------|------------------------------------|
| <b>Antibiotics</b>                        |                               |                                    |
| Ceftriaxone                               | 80 (90.9)                     | 43 (36.1)                          |
| Ciprofloxacin                             | 74 (84.1)                     | 39 (32.8)                          |
| Meropenem                                 | 35 (39.8)                     | 4 (3.4)                            |
| Tigecycline                               | 34 (38.6)                     | 4 (3.4)                            |
| <b>Antiviral</b>                          |                               |                                    |
| Favipiravir                               | 6 (6.8)                       | 7 (5.9)                            |
| Remdesivir                                | 14 (15.9)                     | 01 (0.8)                           |
| <b>Antihistamine</b>                      | 13 (14.8)                     | 25 (21)                            |
| <b>Sedatives</b>                          | 33 (39.8)                     | 31 (29)                            |
| <b>Salbutamol inhaler</b>                 | 34 (39.5)                     | 26 (24.5)                          |
| <b>PPI</b>                                | 41 (47.1)                     | 30 (27.3)                          |
| <b>Long acting insulin</b>                | 26 (30.6)                     | 6 (5.6)                            |
| <b>Short acting insulin</b>               | 34 (40)                       | 10 (9.3)                           |
| <b>Complications</b>                      | 63 (71.6)                     | 0                                  |
| Heart failure                             | 20 (22.7)                     | 0                                  |
| Septic shock                              | 15 (17)                       | 0                                  |
| ARDS                                      | 43 (48.9)                     | 0                                  |
| <b>Prognosis</b>                          |                               |                                    |
| Discharge                                 | 62 (70.5)                     | 116 (97.5)                         |
| Referral                                  | 7 (8)                         | 3 (2.5)                            |
| Death                                     | 19 (21.6)                     | 0                                  |
| <b>Hospital stay (days) (median, IQR)</b> | 9 (6, 14)                     | 8 (4, 14)                          |
